# Supplementary figures and images for: Selective Detection of Escherichia coli K12 and Staphylococcus aureus in Mixed Bacterial Communities Using a Single-Walled Carbon Nanotube (SWCNT)-Functionalized Electrochemical Immunosensor with Dielectrophoretic Concentration
Source: MDPI journal article supplement (doi:10.3390/nano13060985), 2023-03-08

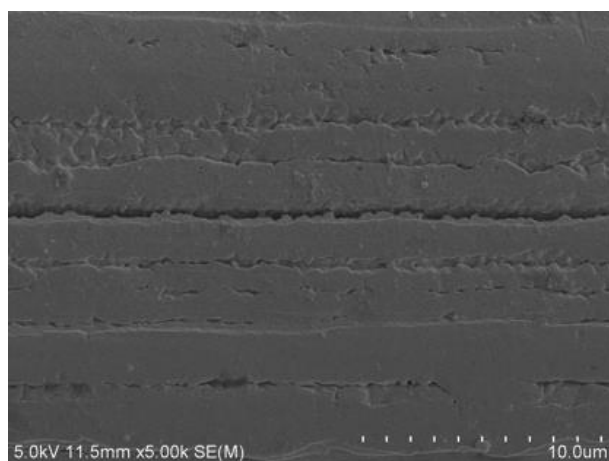

(a)

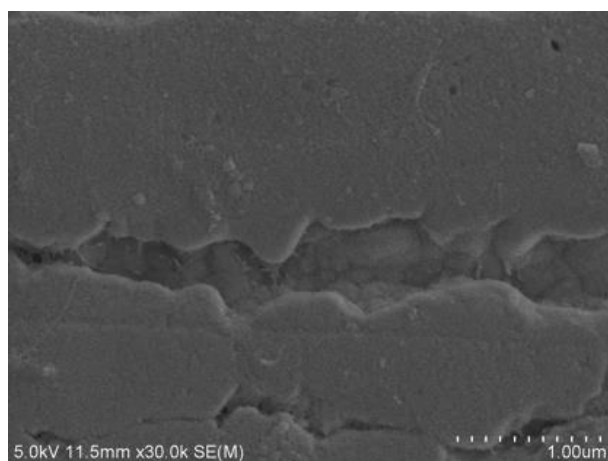

(b)

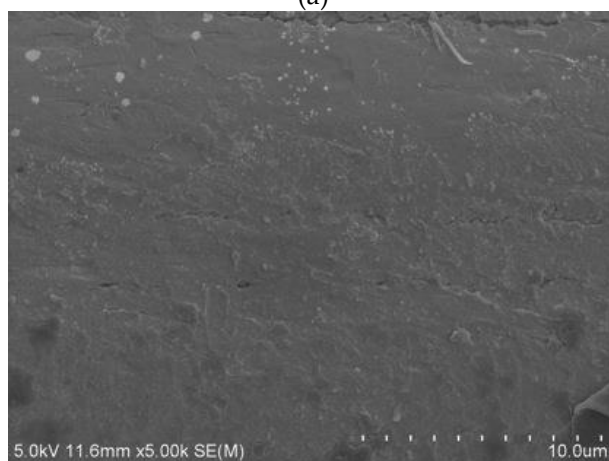

(c)

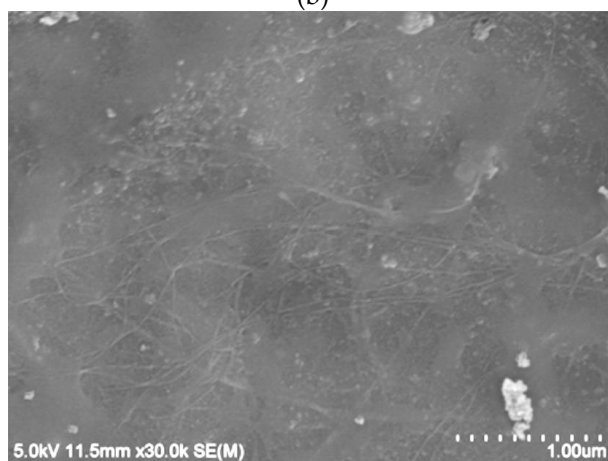

(d)

**Figure S1.** SEM images for bare (a)-(b) and functionalized (c)-(d) microwires

Supplement: s1 [file s1]
